# Supplementary material for: KRAS Mutations Predict Response and Outcome in Advanced Lung Adenocarcinoma Patients Receiving First-Line Bevacizumab and Platinum-Based Chemotherapy
Source: MDPI journal article supplement (doi:10.3390/cancers11101514), 2019-10-09
Supplement: s1 [file s1]

# Supplementary Materials: KRAS Mutations Predict Response and Outcome in Advanced Lung Adenocarcinoma Patients Receiving First-Line Bevacizumab and Platinum-Based Chemotherapy

Aron Kristof Ghimessy, Aron Gellert, Erzsebet Schlegl, Balazs Hegedus, Erzsebet Raso, Tamas Barbai, Jozsef Timar, Gyula Ostoros, Zsolt Megyesfalvi, Balazs Gieszer, Judit Moldvay, Ferenc Renyi-Vamos, Zoltan Lohinai, Mir Alireza Hoda, Thomas Klikovits, Walter Klepetko, Viktoria Laszlo and Balazs Dome

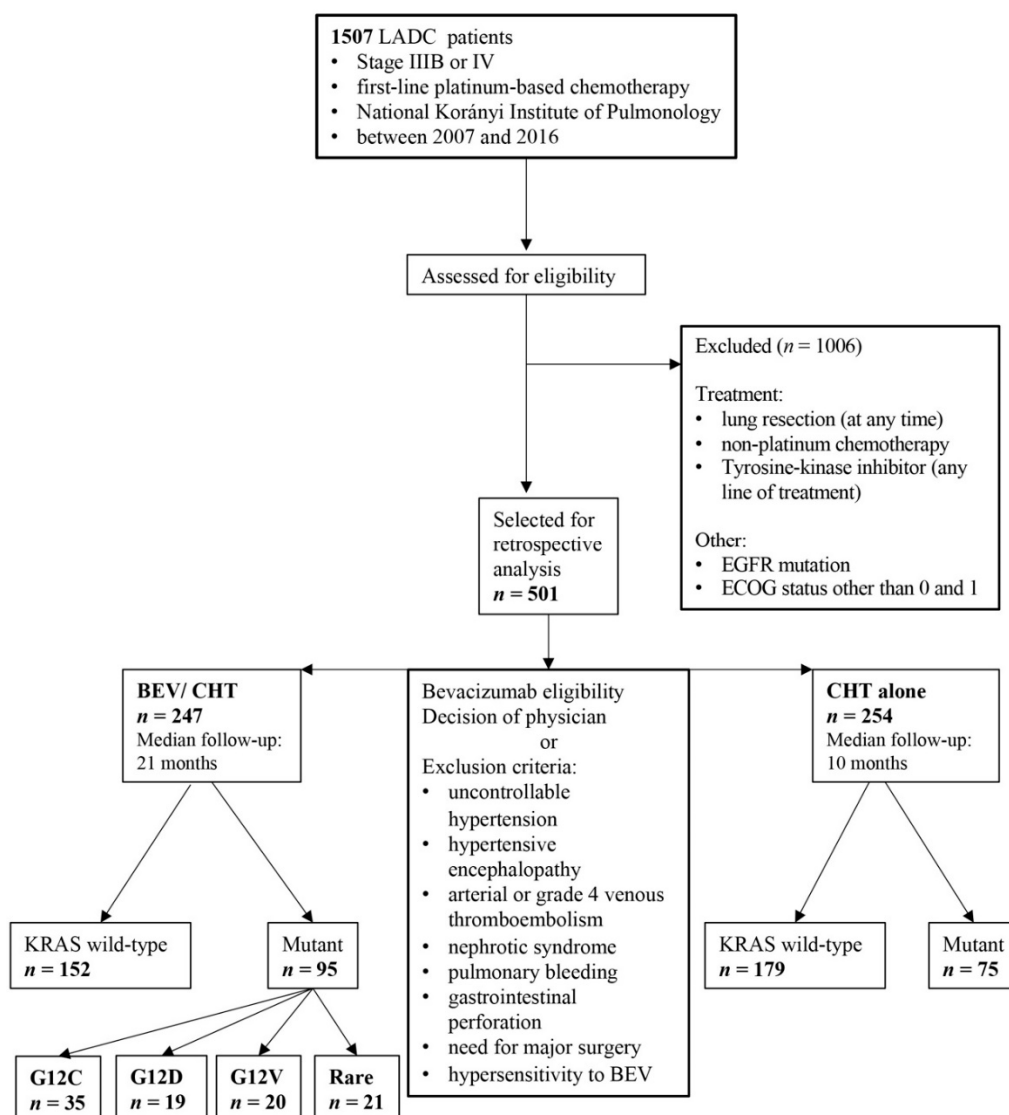

**Figure S1.** Consort diagram for advanced LADC cases. Consort diagram to demonstrate the selection of stage IIIB/IV LADC cases for BEV/CHT or CHT alone in this study. Where patients were excluded, the reasons for exclusion are indicated.

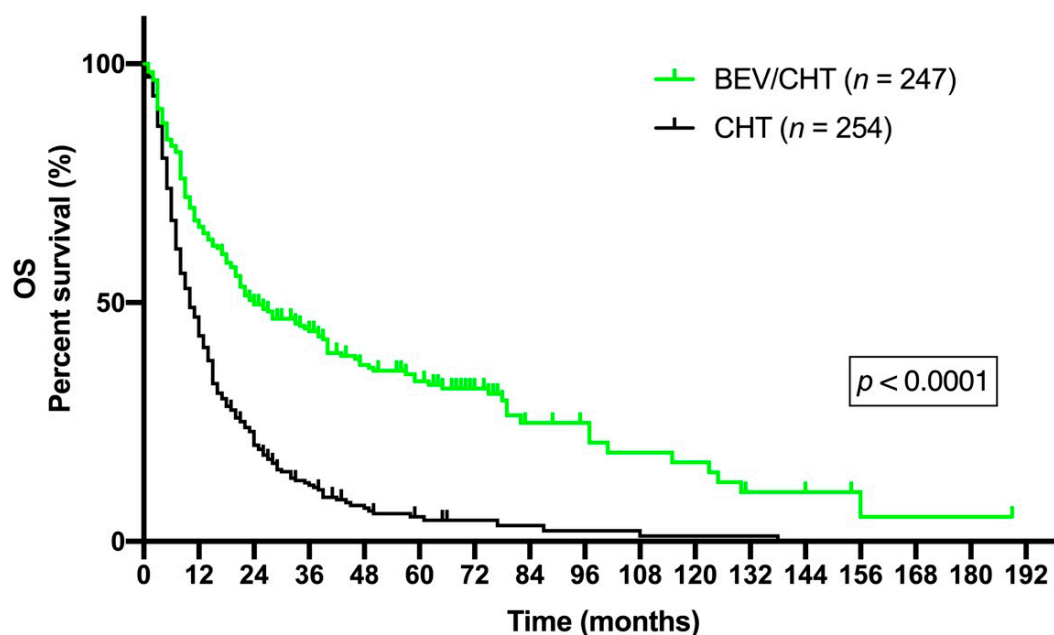

**Figure S2.** Comparison of survival outcomes in patients with advanced LADC according to treatment regimen. Advanced LADC patients receiving BEV/CHT showed significantly higher median OS compared to those treated with CHT only (median OSs were 24 vs. 10 months, respectively,  $p < 0.0001$ , log-rank test).

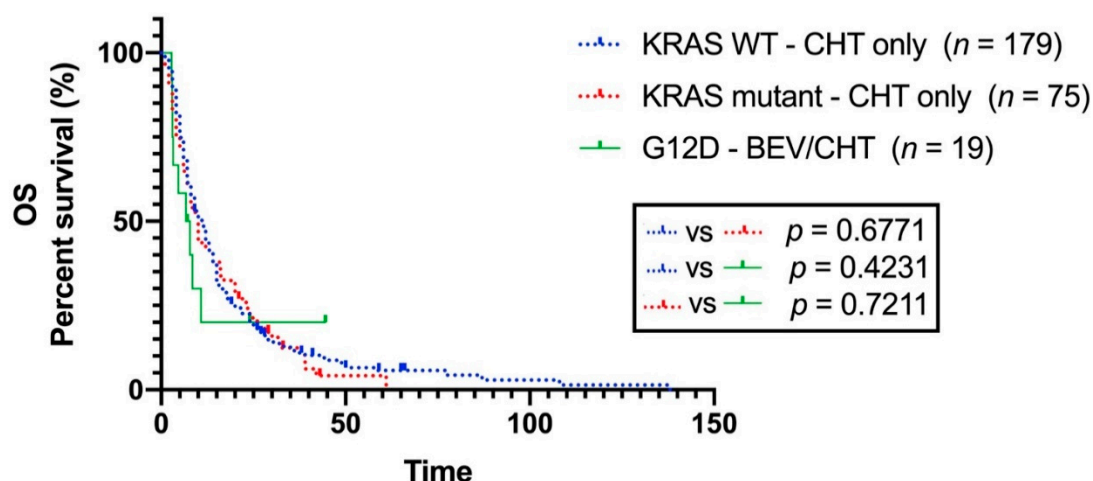

**Figure S3.** Kaplan-Meier curves for the OS of LADC patients treated with CHT alone and LADC patients with KRAS G12D mutations in the BEV/CHT sub-cohort. Patients with tumors harboring KRAS G12D mutations and treated with BEV/CHT had comparable OS to that of patients with KRAS WT or KRAS mutant tumors in the CHT alone sub-cohort.

**Table S1.** Correlation of clinicopathologic features, outcome variables and KRAS codon 12 subtypes in patients with advanced LADC treated with BEV ( $n = 95$ ).

| All Patients             |         | G12C | G12D | G12V | Rare Mutation | $p$ -value <sup>a</sup> |
|--------------------------|---------|------|------|------|---------------|-------------------------|
|                          |         | 35   | 19   | 20   | 21            |                         |
| Age (years) <sup>b</sup> | Median: | 61   | 61   | 56   | 56            | 0.579                   |
|                          | SD*:    | 7.7  | 7.1  | 8.7  | 7.2           |                         |
|                          | Range:  | 32   | 30   | 31   | 19            |                         |
| Smoking <sup>c</sup>     |         |      |      |      |               | 0.182                   |
| Never-smoker             |         | 2    | 0    | 2    | 2             |                         |
| Ever-smoker              |         | 33   | 15   | 12   | 14            |                         |
| No data (15)             |         |      |      |      |               |                         |

|                       |       |      |       |       |        |
|-----------------------|-------|------|-------|-------|--------|
| Gender <sup>c</sup>   |       |      |       |       |        |
| Female                | 21    | 6    | 12    | 15    | 0.072  |
| Male                  | 14    | 13   | 8     | 6     |        |
| ECOG <sup>c</sup>     |       |      |       |       |        |
| 0                     | 17    | 7    | 11    | 17    | 0.594  |
| 1                     | 18    | 12   | 9     | 4     |        |
| Stage <sup>c</sup>    |       |      |       |       |        |
| III                   | 12    | 3    | 1     | 1     | 0.071  |
| IV                    | 23    | 16   | 19    | 20    |        |
| Survival <sup>d</sup> |       |      |       |       |        |
| Median PFS (months)   | 8,53  | 3,77 | 8,17  | 6,77  | 0,0057 |
| Median OS (months)    | 19,20 | 7,27 | 14,97 | 12,97 | 0.0414 |

<sup>a</sup> *p* value is calculated between KRAS codon 12 subtypes, <sup>b</sup> Kruskal-Wallis test, <sup>c</sup> Chi-square test, <sup>d</sup> log rank regression analysis, \* SD: Standard Deviation.
